# Supplementary material
Source: PubMed Central journal article supplement (PMC7705302)
Supplement: supp_RA120.015215_162251_2_supp_590761_qg940y.pdf [file supp_RA120.015215_162251_2_supp_590761_qg940y.pdf]

**Supplemental Table 1:** Primer sequences for ChIP and RT-qPCR studies.

| <b>Chromatin Immunoprecipitation (ChIP) Primers</b> |                                        |                                        |
|-----------------------------------------------------|----------------------------------------|----------------------------------------|
| <b>Gene</b>                                         | <b>Forward Primer Sequence (5'-3')</b> | <b>Reverse Primer Sequence (5'-3')</b> |
| <i>Trp53inp1</i>                                    | GATTGGTCGGCCTGCGG                      | TTGTTGTGCAGCTCTGGGAA                   |
| <i>p21</i>                                          | ACCTAGTGTCTGGGCATCTC                   | TCAGGTCTCCACCACCCTG                    |
| <i>Gabarap</i>                                      | TCCGCTCTGGTGTAGTCCTT                   | GGCTCAGGCTTATGTGAACCA                  |
| <i>Adrm1</i>                                        | TTTCTGCGAGTCGTGGAGGC                   | TGTTGCTGTGTCATAGGGGAGC                 |
| <i>Prkaa2</i>                                       | ATTCTCCTTCCATCTCGGTCGC                 | CCGAGGCGTCCCGAGAAAAG                   |
| <i>Jmy</i>                                          | GGAAAAGGGGGCAGGGCT                     | GAGGGACGTAAACACGGGCA                   |
| <i>Gtf2h1</i>                                       | AATGGTTGTGAGCCACCATGTG                 | GCCGACTGCTCTTCCAAACATC                 |
| <i>Crebrf</i>                                       | CCCACCGGCAGTAAAACTACG                  | TATGTCCTTCCCTGACGGGTTC                 |
| <i>Sall1</i>                                        | CCCCATTACTCAGCCGAAGTT                  | GAGGTTCCCGAAGTCCTGCAC                  |
| <i>Col4a1</i>                                       | CTCCGAGACTGAGCACCTCG                   | AGAGACGGCGGGGAAATGC                    |
| <b>RT-qPCR Primers</b>                              |                                        |                                        |
| <b>Gene</b>                                         | <b>Forward Primer Sequence (5'-3')</b> | <b>Reverse Primer Sequence (5'-3')</b> |
| <i>Gapdh</i>                                        | GGTTGTCTCCTGCGACTTCA                   | CCCTAGGCCCTCCTGTTAT                    |
| <i>Trp53inp1</i>                                    | GGCCAACTGAAGACAGGGTT                   | CCTCTGCTGAGAAACCAGGG                   |
| <i>p21</i>                                          | CTAGGGGAATTGGAGTCAGGC                  | ACCAGGATTGGACATGGTGC                   |
| <i>Gabarap</i>                                      | GAAAAAGCCCCAAAGCTCG                    | CACTGGTGGGTGGAATGACA                   |
| <i>Adrm1</i>                                        | CGGCTGACGGAACTCAATC                    | CTGAAGTCGTCATCCTGGCG                   |
| <i>Prkaa2</i>                                       | ACGAACTAGCTGTGGATCGC                   | ATCATCGAAAGGGAGGGTGC                   |
| <i>Jmy</i>                                          | AGGATGAAGCCTACAGCAGC                   | TCTCGCATGTCTCGGAATGG                   |
| <i>Gtf2h1</i>                                       | GAAGCAGGATGGAGCACTGT                   | CCTTCACTGCATCCCGTTCT                   |
| <i>Crebrf</i>                                       | TCAGCCTCAGAACCGAAAT                    | CCAAGCCCAGATCCTGTGAG                   |
| <i>Sall1</i>                                        | AACCCGGAAGAGGGAGTACA                   | TCGGGGTTCGGATTGGAAATG                  |
| <i>Col4a1</i>                                       | TCATTAGCAGGTGTGCGGTT                   | GTTAGGGCACTGCGGAATCT                   |
| <i>Mdm2</i>                                         | TCCTATTGGTCCAGGAGGCG                   | CGGAGAGAACGCCGGAAG                     |
| <i>Fas</i>                                          | ATAGGAGCGAAGCGGTTTGT                   | CCCACAGGCAGTCTAGAGCT                   |
| <i>Aen</i>                                          | TCCGAACTCGGGTCTCTCTT                   | GCTGGTACAACCTCCATGGCT                  |
| <i>Plk3</i>                                         | AGAAGGCTGGTTCCCACGCTG                  | AGCGAACGATATGGCGGTGCTG                 |
| <i>Ddit4l</i>                                       | GTGAAATCCGGCAGCGCCTAGG                 | TGCCCCTTGCAACCATGGTCAA                 |
| <i>Sesn1</i>                                        | ATCCCTCGGCCACTAGGACACG                 | GTGCGTCTTCACTGCCACCTG                  |
| <i>Dram1</i>                                        | ACTTGGTGTCTTGGCGCTTGG                  | TCATGGACCACAGGCACGGCTA                 |
| <i>Dyrk3</i>                                        | CGGAGGTTGGGGGATGGTGTCT                 | AGTGCTGAGTGTGGCCTCTCGT                 |
| <i>Noxa</i>                                         | GCCCAGATTGGGGACCTTAG                   | TCTTCTGAGTTGAGCTGCG                    |

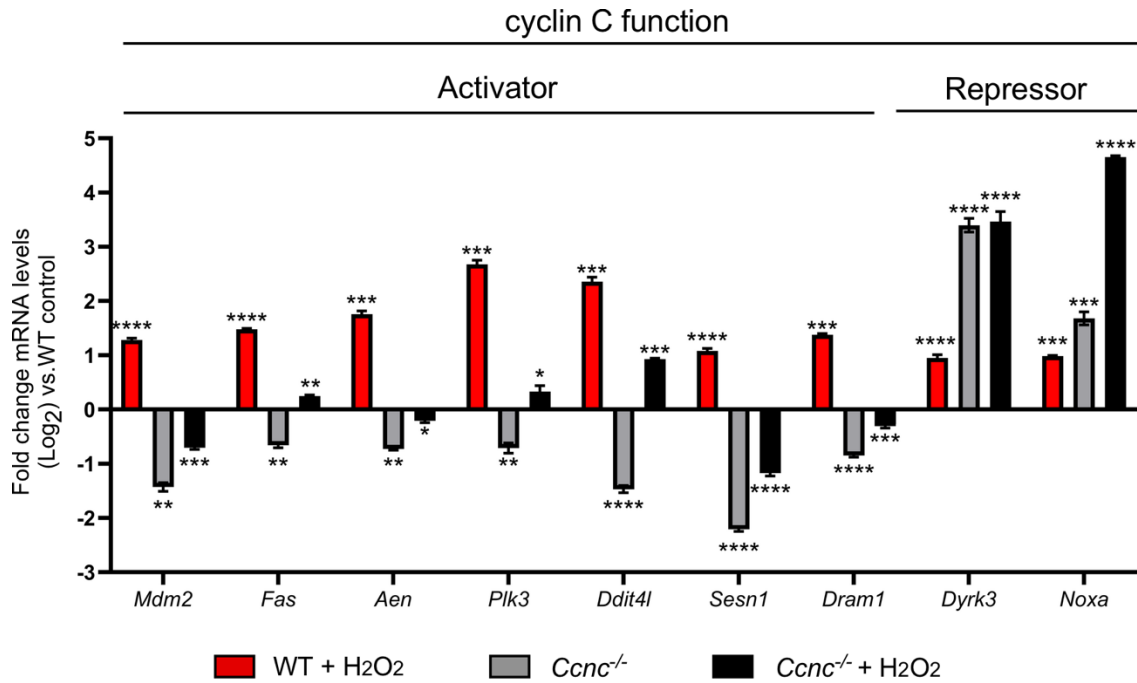

**Figure S1: Cyclin C activator and repressor roles for H<sub>2</sub>O<sub>2</sub>-induced genes requiring p53.** H<sub>2</sub>O<sub>2</sub>-induced genes identified by RNA-seq analysis were sorted into a cohort with the GO term “p53 regulated”. RT-qPCR analysis was performed on nine randomly selected genes in WT and *Ccnc*<sup>-/-</sup> MEF cultures before and after H<sub>2</sub>O<sub>2</sub> treatment. Values shown are based on untreated WT control. Statistical significance is indicated by the following: \* p-value < 0.05, \*\* p-value < 0.01, \*\*\* p-value < 0.001, \*\*\*\* p-value < 0.0001.

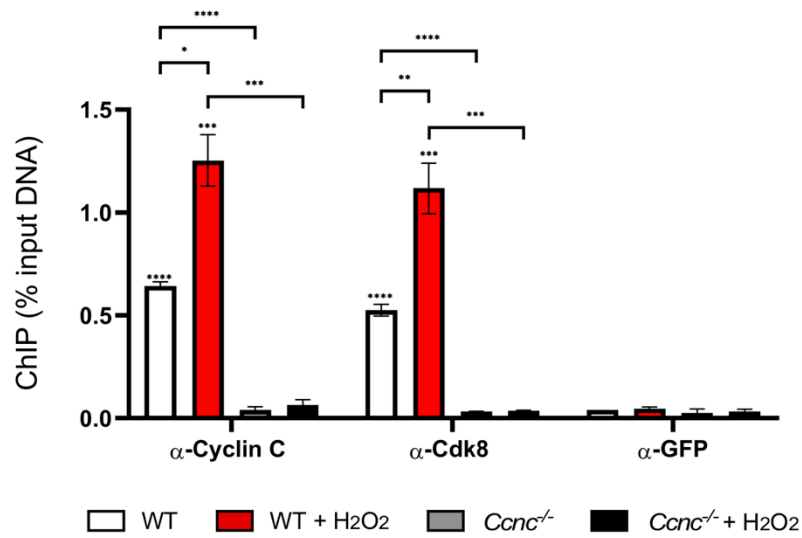

**Figure S2: Cdk8 and cyclin C antibody specificity for ChIP experiments.** ChIP analysis of *Trp53Inp1* in the cell cultures, conditions and antibodies as indicated. Data obtained from RT-qPCR analysis from DNA purified from ChIP was calculated as percent input DNA. Statistical significance is indicated by the following: \* p-value < 0.05, \*\* p-value < 0.01, \*\*\* p-value < 0.001, \*\*\*\* p-value < 0.0001

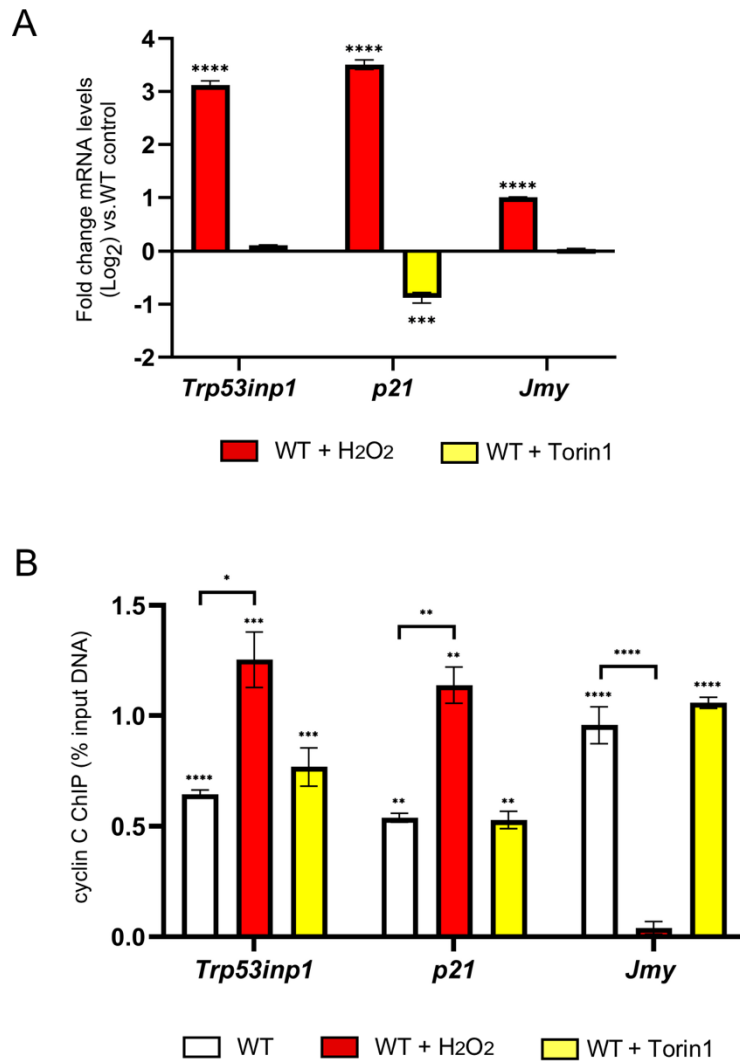

**Figure S3: Genes within the p53-mediated response network are not induced during Torin1 stress.** RT-qPCR (A) and ChIP (B) data analysis on the genes indicated. Data obtained for mRNA levels and cyclin C-dependent ChIP were compared to an untreated WT control and a non-specific antibody (GFP), respectively. Statistical significance is indicated by the following: \* p-value < 0.05, \*\* p-value < 0.01, \*\*\* p-value < 0.001, \*\*\*\* p-value < 0.0001.
